# Supplementary material
Source: Springer Nature journal article supplement (https://www.springermedizin.de/resource/supplementary/12889_2012_5896_MOESM1_ESM.pdf/9496320)
Supplement: MOESM1 [file 9496320]

| <i>Levels</i>                   | <b>Contextual Factors</b>                                                                           | <b>Psychosocial Factors</b>                                      | <b>Technology Factors</b>                                                                                               |
|---------------------------------|-----------------------------------------------------------------------------------------------------|------------------------------------------------------------------|-------------------------------------------------------------------------------------------------------------------------|
| <i>Societal/ Structural</i>     | Policy and regulations, climate and geography                                                       | Leadership/advocacy, cultural identity                           | Manufacturing, financing, and distribution of the product; current and past national policies and promotion of products |
| <i>Community</i>                | Access to markets, access to resources, built and physical environment                              | Shared values, collective efficacy, social integration, stigma   | Location, access, availability, individual vs. collective ownership/access, and maintenance of the product              |
| <i>Interpersonal/ Household</i> | Roles and responsibilities, household structure, division of labour, available space                | Injunctive norms, descriptive norms, aspirations, shame, nurture | Sharing of access to product, modelling/demonstration of use of product                                                 |
| <i>Individual</i>               | Wealth, age, education, gender, livelihoods/employment                                              | Self-efficacy, knowledge, disgust, perceived threat              | Perceived cost, value, convenience, and other strengths and weaknesses of the product                                   |
| <i>Habitual</i>                 | Favourable environment for habit formation, opportunity for and barriers to repetition of behaviour | Existing water and sanitation habits, outcome expectations       | Ease/Effectiveness of routine use of product                                                                            |
